# Supplementary material for: A rapid and eco-friendly approach for the synthesis of low-silica SAPO-34 with excellent MTO catalytic performance
Source: Royal Society of Chemistry journal article supplement (doi:10.1039/d4cc01017e), 2024-01-01
Supplement: d4cc01017e1.pdf [file d4cc01017e1.pdf]

## **A Rapid and Eco-friendly Approach for the Synthesis of Low-silica SAPO-34 with Excellent MTO Catalytic Performance**

Xiaoxia Zou,<sup>ab</sup> Dong Fan,<sup>b</sup> Xiaosi Zhang,<sup>bc</sup> Caiyi Lou,<sup>bc</sup> Miao Yang,<sup>b</sup> Shutao Xu,<sup>b</sup> Quanyi Wang,<sup>\*b</sup>  
Peng Tian<sup>\*b</sup> and Zhongmin Liu<sup>bc</sup>

<sup>a</sup> Henan Institute of Advanced Technology, Zhengzhou University, Zhengzhou 450003, China.  
National Engineering Research Center of Lower-Carbon Catalysis Technology, Dalian.

<sup>b</sup> National Laboratory for Clean Energy, Dalian Institute of Chemical Physics, Chinese  
Academy of Sciences, Dalian 116023, China.  
E-mail: qywang@dicp.ac.cn, tianpeng@dicp.ac.cn

<sup>c</sup> University of Chinese Academy of Sciences, Chinese Academy of Sciences, Beijing 100049,  
China.

## Experimental

### Materials

The SAPO-34-based mother liquid, which was obtained after evaporation to remove organics and concentration by mechanical vapor recompression (MVR), was acquired from the scale-up platform of DICP for molecular sieves synthesis. Note that the use of concentrated mother liquid can increase its addition amounts (based on inorganic oxides) for each batch.

The chemical reagents used include silica gel (27.3 wt% SiO<sub>2</sub>, Shenyang Chemical Industry Co., Ltd.), phosphoric acid (80 wt% H<sub>3</sub>PO<sub>4</sub>, Sichuan Xianfeng Chemical Co.), pseudo boehmite (67.5 wt% Al<sub>2</sub>O<sub>3</sub>, Shandong aluminum Co., Ltd.). Tetraethylammonium hydroxide (35 wt% TEAOH), diethylamine (DEA, 99 wt%), triethylamine (TEA, 99 wt%) and morpholine (MOR, 99 wt%) were purchased from Tianjin cameo chemical reagent Co., Ltd.

### Synthesis of SAPO-34 by utilization of recycled mother liquid

The gel molar composition for SAPO-34 synthesis with the addition of recycled mother liquid was 1.0Al<sub>2</sub>O<sub>3</sub>:1.0P<sub>2</sub>O<sub>5</sub>:0.1-0.6SiO<sub>2</sub>:50H<sub>2</sub>O:xR(template). The amount of mother liquid added in the gel varied from 10 g to 40 g.

The typical synthesis procedure for mother liquid addition of 40 g was as follows. Mother liquid (40 g), H<sub>2</sub>O (6.74 g), silica sol (2.08 g), pseudo boehmite (3.59 g) and phosphoric acid (5.56 g) were added in sequence into a beaker under stirring. The mixture was stirred for 20 min at room temperature. After further addition of organic amines (TEA: 10.12 g, DEA: 3.66 g) and stirring for 20 min, a final gel mixture can be obtained, which has a molar composition of 1.0Al<sub>2</sub>O<sub>3</sub>:1.0P<sub>2</sub>O<sub>5</sub>:0.25SiO<sub>2</sub>:2.0TEA:1.0DEA:50H<sub>2</sub>O. The gel mixture was transferred into a 100 mL stainless steel autoclave, sealed, placed in an oven. Subsequently, the autoclave was heated to the designed temperature in 120 min under rotation and kept for a certain time. After crystallization, the autoclave was cooled immediately. The solid product was washed with deionized water, separated by centrifugation, and then dried at 120 °C. The samples were calcined at 550 °C for 6 h to remove the organics before characterization and catalytic test.

The ratio of  $\text{Mass}_{(\text{dry inorganic oxides from mother liquid})} / \text{Mass}_{(\text{total dry inorganic oxides})}$  for the above synthesis (mother liquid addition of 40 g) was 52.2 wt%.

The sample yields are calculated based on the following formula:  $\text{yield (wt\%)} = \text{M}_{\text{sample}} \times 0.85 \times 100 / (\text{M}_{\text{inorganic oxides}})_{\text{gel}}$ , where  $\text{M}_{\text{sample}}$ , 0.85 and  $(\text{M}_{\text{inorganic oxides}})_{\text{gel}}$  stand for sample weight, an estimated value of inorganic framework in the samples, and dry mass of inorganic oxides in the starting gels, respectively.

### Characterization

X-ray diffraction (XRD) patterns of the samples were measured on a Panalytical X'Pert PRO X-ray diffractometer, which uses Cu K $\alpha$  radiation ( $\lambda = 1.5418 \text{ \AA}$ ) at 40 mA and 40 kV. The relative crystallinity of the samples was calculated according to the sum of the peak height at  $2\theta = 9.48^\circ$ ,  $16.02^\circ$  and  $20.56^\circ$ . For each recipe, the sample with the highest value was defined as standard sample with a relative crystallinity of 100%.

Elemental composition was measured using a Panalytical AXios X-ray fluorescence (XRF) spectrometer. Scanning electron microscopy (SEM) images of the samples were acquired with a Hitachi

SU8020 scanning electron microscope.

Textural properties of the calcined samples were determined by N<sub>2</sub> adsorption at -196 °C on a Micromeritics ASAP 2020 system. Each sample was pretreated in vacuum at 350 °C for 6 h. The total surface area was calculated based on the BET equation. The micropore volume and micropore surface area were evaluated using the t-plot method.

The surface element compositions of the samples were measured using X-ray photoelectron spectroscopy (XPS) on a Thermo fisher ESCALAB 250Xi XPS instrument, which was provided by a monochromatic Al K $\alpha$  (1486.6 eV, 15 kV, 10.8 mA) X-ray excitation source. The surface atomic concentrations were determined from the photoelectron peak areas of Si 2p, Al 2p and P 2p.

NH<sub>3</sub>-TPD was determined using a Micromeritics Autochem Model 2920 Chemisorber. Prior to the measurement, ~0.1 g of calcined sample was pretreated under He at 650 °C for 1 h. Then, the sample was cooled down to 100 °C, exposed in NH<sub>3</sub> (2% NH<sub>3</sub> in He) for 0.5 h and purged by He for 1 h to remove physically adsorbed NH<sub>3</sub>. The measurement was conducted from 100 to 650 °C with a heating rate of 10 °C/min under He flow (30 mL/min).

Dynamic light scattering (DLS) analysis of the mother liquid was measured with Malvern Zetasizer Nano.

Liquid-state NMR experiments were performed on a Bruker AVANCE III 400 instrument equipped with a 5.0 mm liquid probe at a <sup>1</sup>H observed frequency of 400.23 MHz. The resonance frequencies of <sup>27</sup>Al, <sup>29</sup>Si, and <sup>31</sup>P were 104.2, 79.4, and 161.9 MHz respectively. The chemical shift of the <sup>27</sup>Al, <sup>29</sup>Si, and <sup>31</sup>P nucleus was referenced to 1 M aqueous Al(NO<sub>3</sub>)<sub>3</sub> (0 ppm), TMS (0 ppm), and 85% H<sub>3</sub>PO<sub>4</sub> (0 ppm), respectively.

All solid-state NMR experiments were performed using a 4 mm MAS probe at a spinning rate of 12 kHz over Bruker Avance NEO 500 spectroscopic instrument equipped with an 11.7 T wide-aperture magnet. The <sup>27</sup>Al MAS NMR spectra were recorded using a single  $\pi/18=0.50$   $\mu$ s pulse sequence with a recycle delay of 1 s. The <sup>1</sup>H–<sup>29</sup>Si cross-polarization (CP) MAS measurements were performed with a contact time of 3 ms and a recycle delay of 1 s. The <sup>31</sup>P MAS NMR spectra were conducted with high-power proton (<sup>1</sup>H) decoupling using a  $\pi/2$  pulse of 2.8  $\mu$ s and a recycle delay of 60 s. The chemical shifts of the <sup>27</sup>Al, <sup>29</sup>Si, and <sup>31</sup>P nucleus were externally referenced to 1 M aqueous Al(NO<sub>3</sub>)<sub>3</sub> (0 ppm), kaolinite (-91.5 ppm), and NH<sub>4</sub>H<sub>2</sub>PO<sub>4</sub> (1 ppm), respectively.

### **MTO catalytic activity**

The MTO reactions were performed in a fixed bed reactor at atmospheric pressure. In a typical procedure, the calcined catalyst (0.3 g, 40–60 meshes) was loaded in the reactor and was activated at 500 °C for 2 h under N<sub>2</sub> at a flow rate of 42 mL/min before starting each reaction, and then was adjusted to the reaction temperature of 450 °C. The methanol was fed by passing the carrier gas through a saturator containing methanol, which gave a WHSV of 3.65 h<sup>-1</sup>. The reaction products were analyzed using an on-line gas chromatograph (Agilent GC 7890N) equipped with a flame ionization detector (FID) and a capillary column of Pora PLOT Q-HT. The conversion was calculated on a CH<sub>2</sub> basis, and dimethyl ether (DME) was considered as a reactant. The distribution of the product was determined by mass percent and the total hydrocarbon was 100%. Catalyst lifetime was defined as the duration of methanol conversion over 99%.

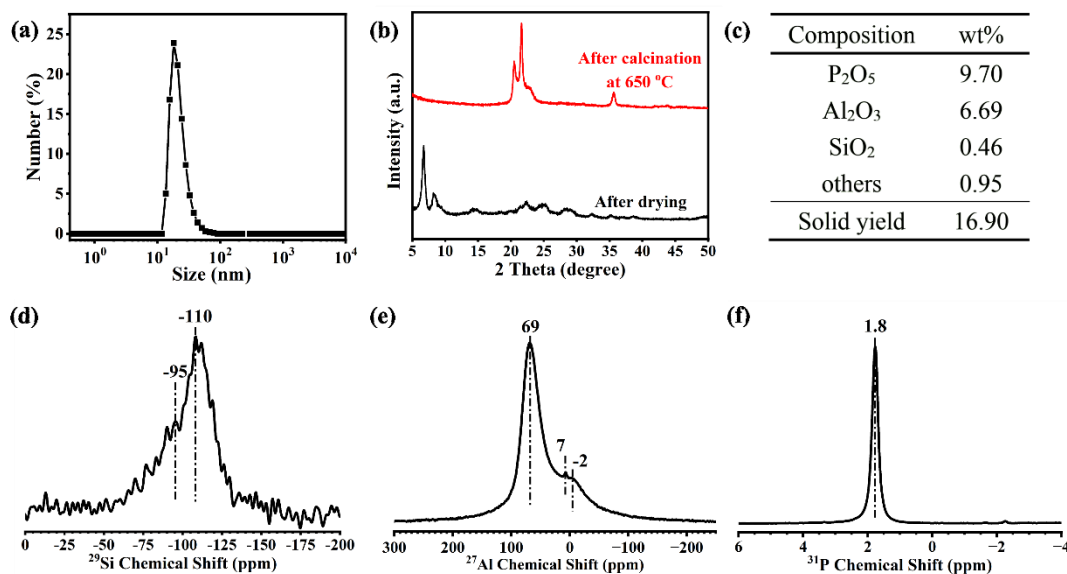

**Figure S1.** (a) Particle size distribution of the diluted mother liquid, (b) XRD patterns and (c) inorganic compositions of the dried and calcined mother liquid. (d) Liquid <sup>29</sup>Si, (e) <sup>31</sup>P and (f) <sup>27</sup>Al NMR spectra of the diluted mother liquid.

An evidently broadened resonance band centered at -108 ppm is observed in the <sup>29</sup>Si spectrum, which can be owing to Si(OAl)<sub>n</sub>(OSi)<sub>m</sub>(OH)<sub>4-n-m</sub> (0 ≤ m ≤ 4, 0 ≤ n ≤ 4, 0 ≤ m + n ≤ 4) species and implies the heterogeneous environments of Si nuclei. In the <sup>31</sup>P spectrum, the distinct signal at 1.07 ppm can be ascribed to HPO<sub>4</sub><sup>2-</sup> ions bonded to aluminum species in the aluminophosphate complexes.<sup>[1,2]</sup> In the <sup>27</sup>Al spectrum, the predominant resonance centered at 68.5 ppm should mainly arise from penta-/tetra-coordinated Al that are oxygen-bridged to phosphorus. The weak shoulder band between 20 and -40 ppm is likely due to octahedral Al species bonded to HPO<sub>4</sub><sup>2-</sup> ions. The above results suggest that the silicon and aluminum environments are highly diverse and heterogeneous, whereas the status of phosphorus appears relatively uniform in the mother liquid.

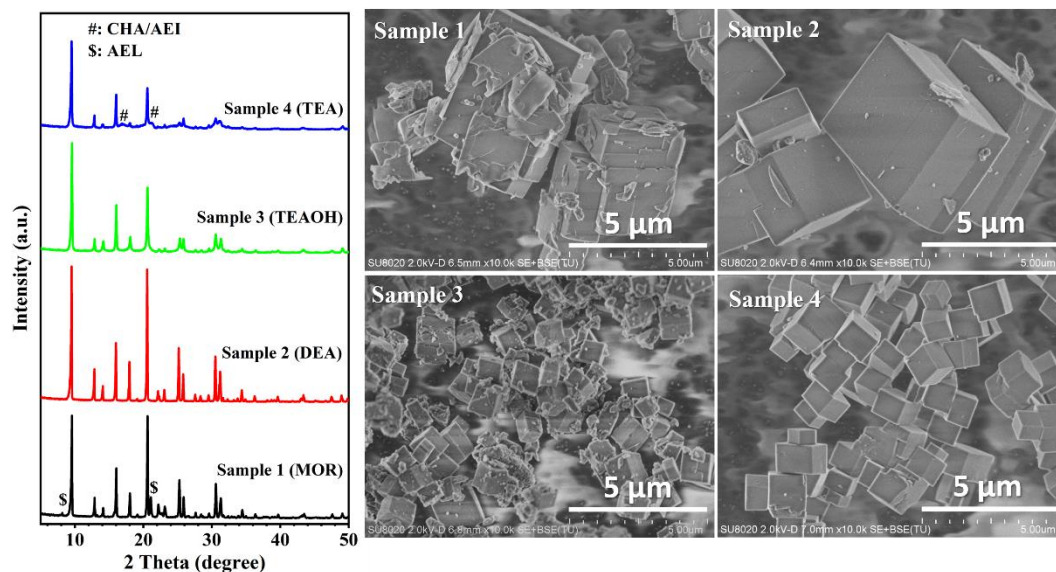

**Figure S2.** XRD patterns and SEM images of the samples synthesized with different organic amines as the template. The final gel molar composition was  $1.0\text{Al}_2\text{O}_3:1.0\text{P}_2\text{O}_5:0.25\text{SiO}_2:x\text{R}(\text{template}):50\text{H}_2\text{O}$  ( $220^\circ\text{C}$ , 5 h, mother liquid addition of 40 g).

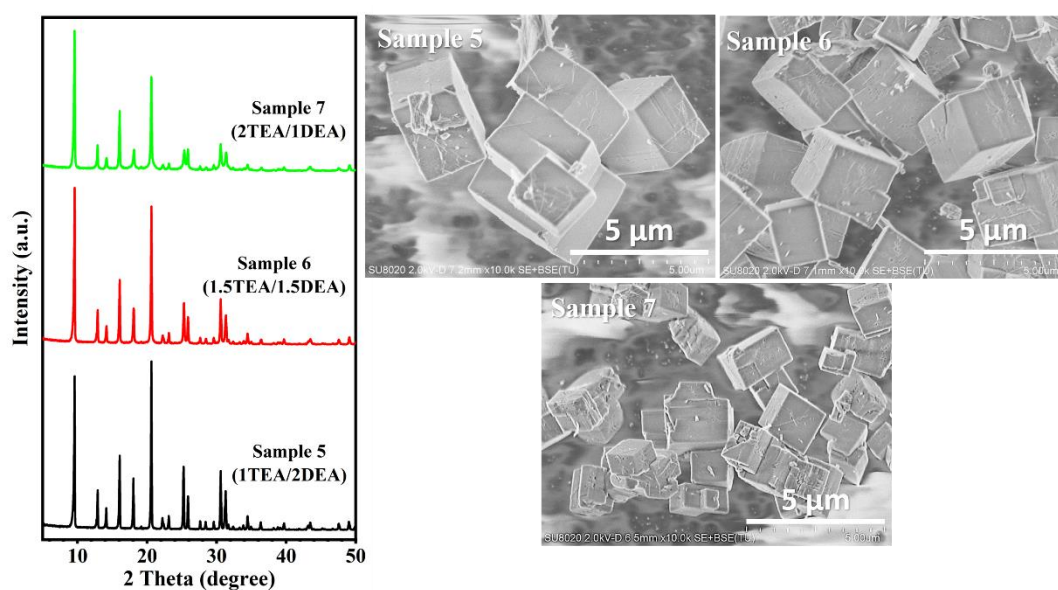

**Figure S3.** XRD patterns and SEM images of SAPO-34 synthesized with dual template (TEA-DEA). The final gel molar composition was  $1.0\text{Al}_2\text{O}_3:1.0\text{P}_2\text{O}_5:0.25\text{SiO}_2:x\text{TEA}:y\text{DEA}:50\text{H}_2\text{O}$  ( $220^\circ\text{C}$ , mother liquid addition of 40 g). The crystallization time was 5 h for samples 5 and 6, while 3 h for sample 7.

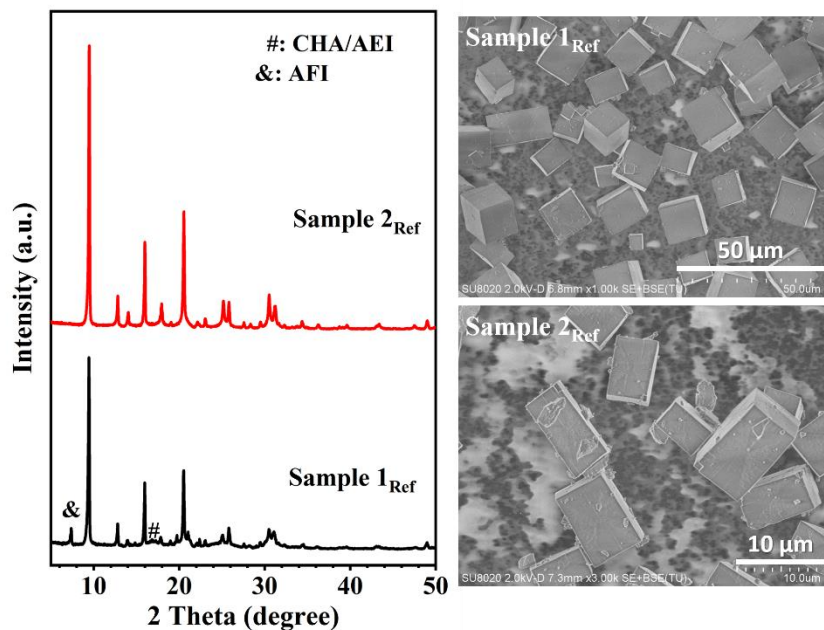

**Figure S4.** XRD patterns and SEM images of samples 1<sub>Ref</sub> and 2<sub>Ref</sub> synthesized without the addition of mother liquid.

|                         | Final gel molar composition                                                                                                                         | Solid yield (wt%) |
|-------------------------|-----------------------------------------------------------------------------------------------------------------------------------------------------|-------------------|
| Sample 1 <sub>Ref</sub> | 1.0Al <sub>2</sub> O <sub>3</sub> :1.0P <sub>2</sub> O <sub>5</sub> : <b>0.25</b> SiO <sub>2</sub> :2.0TEA:1.0DEA:50H <sub>2</sub> O (220 °C, 3 h)  | 74.8              |
| Sample 2 <sub>Ref</sub> | 1.0Al <sub>2</sub> O <sub>3</sub> :1.0P <sub>2</sub> O <sub>5</sub> : <b>0.20</b> SiO <sub>2</sub> :2.0TEA:1.0DEA:50H <sub>2</sub> O (200 °C, 12 h) | 53.4              |

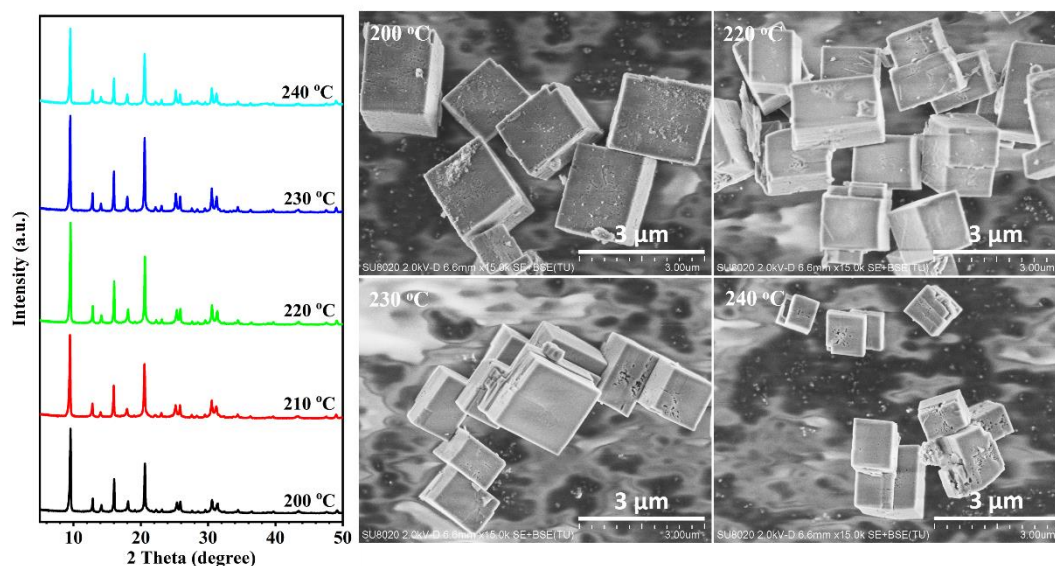

**Figure S5.** XRD patterns and SEM images of SAPO-34 synthesized at different temperatures. The final gel molar composition was 1.0Al<sub>2</sub>O<sub>3</sub>:1.0P<sub>2</sub>O<sub>5</sub>:0.25SiO<sub>2</sub>:2.0TEA:1.0DEA:50H<sub>2</sub>O (3 h, mother liquid addition of 40 g).



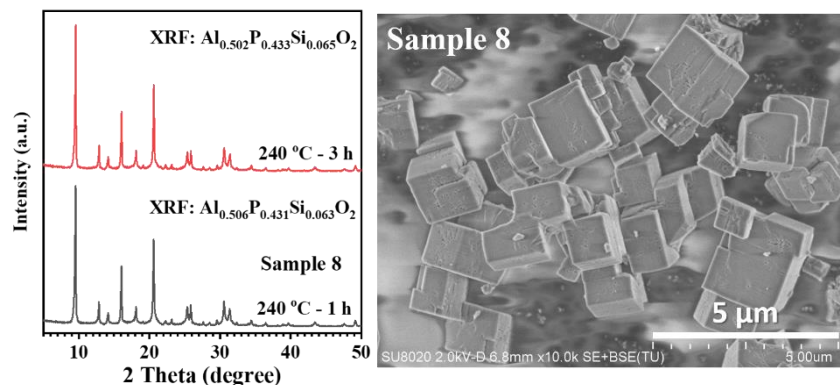

**Figure S6.** XRD patterns and SEM image of the sample synthesized at 240 °C. The final gel molar composition was 1.0Al<sub>2</sub>O<sub>3</sub>:1.0P<sub>2</sub>O<sub>5</sub>:0.25SiO<sub>2</sub>:2.0TEA:1.0DEA:50H<sub>2</sub>O (mother liquid addition of 40 g).

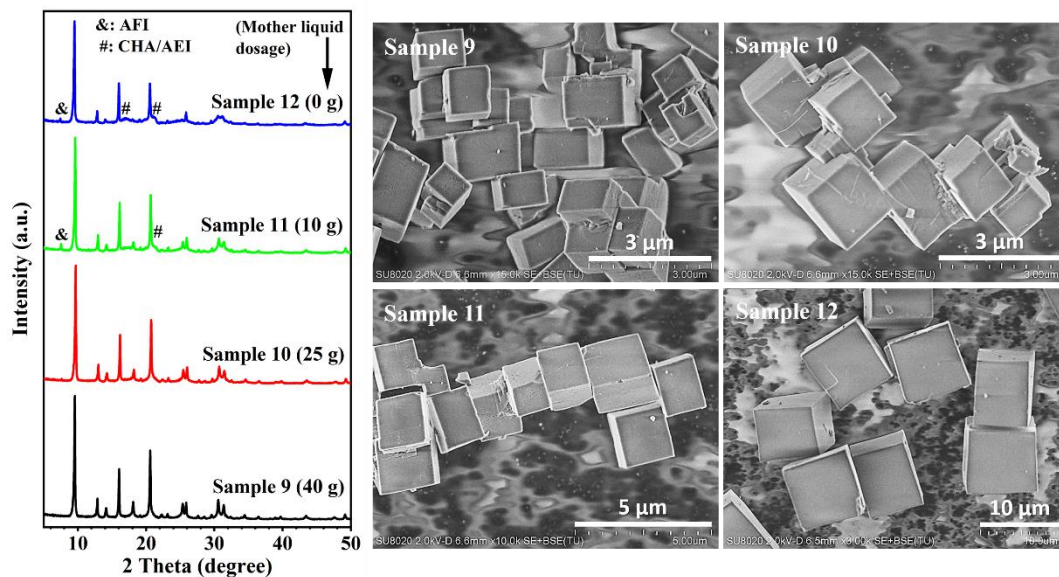

**Figure S7.** XRD patterns and SEM images of the samples synthesized with different amounts of mother liquid. The final gel molar composition was 1.0Al<sub>2</sub>O<sub>3</sub>:1.0P<sub>2</sub>O<sub>5</sub>:0.25SiO<sub>2</sub>:2.0TEA:1.0DEA:50H<sub>2</sub>O (230 °C, 1 h).

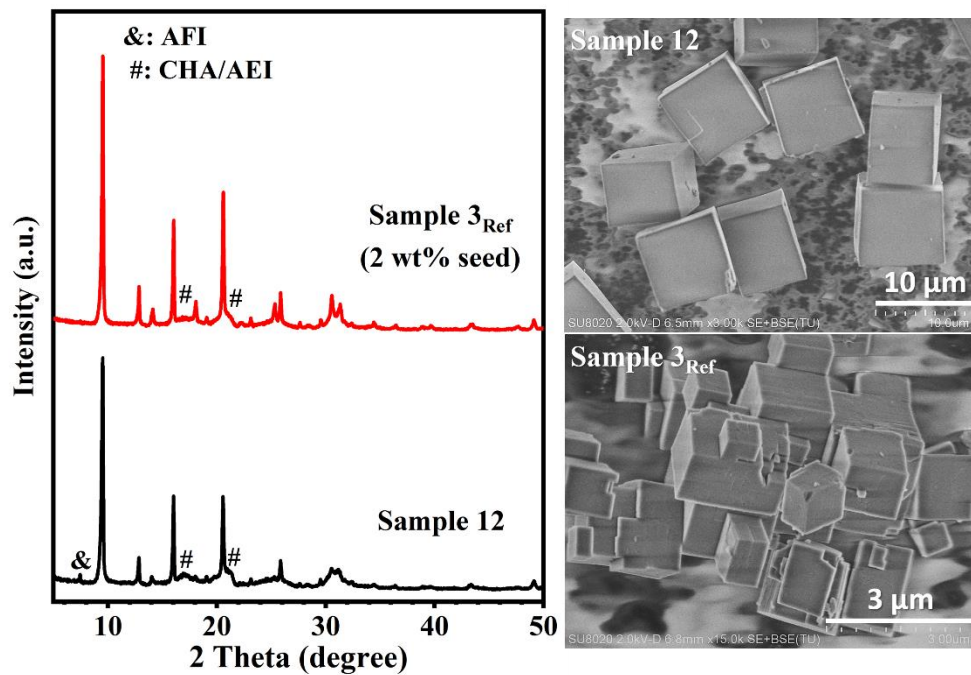

**Figure S8.** XRD patterns and SEM images of SAPO-34 synthesized without the addition of mother liquid. The final gel molar composition was  $1.0\text{Al}_2\text{O}_3:1.0\text{P}_2\text{O}_5:0.25\text{SiO}_2:2.0\text{TEA}:1.0\text{DEA}:50\text{H}_2\text{O}$  (230 °C, 1 h).

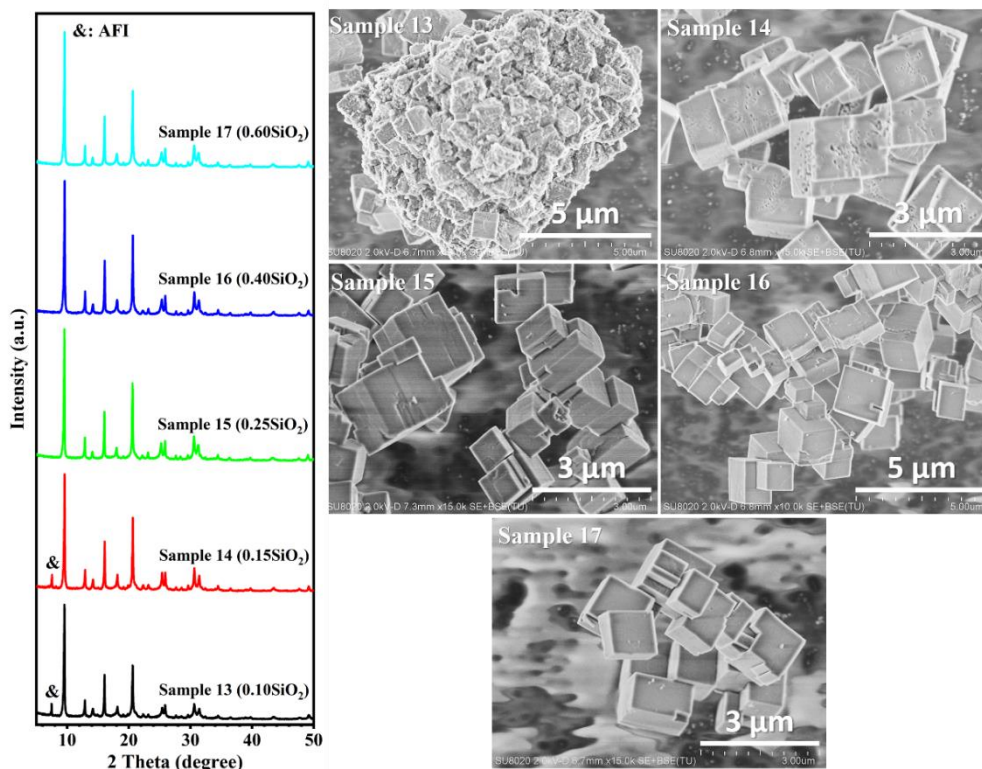

**Figure S9.** XRD patterns and SEM images of the samples synthesized with different silica dosages. The final gel molar composition was  $1.0\text{Al}_2\text{O}_3:1.0\text{P}_2\text{O}_5:x\text{SiO}_2:2.0\text{TEA}:1.0\text{DEA}:50\text{H}_2\text{O}$  (230 °C, 2 h, mother liquid addition of 40 g).



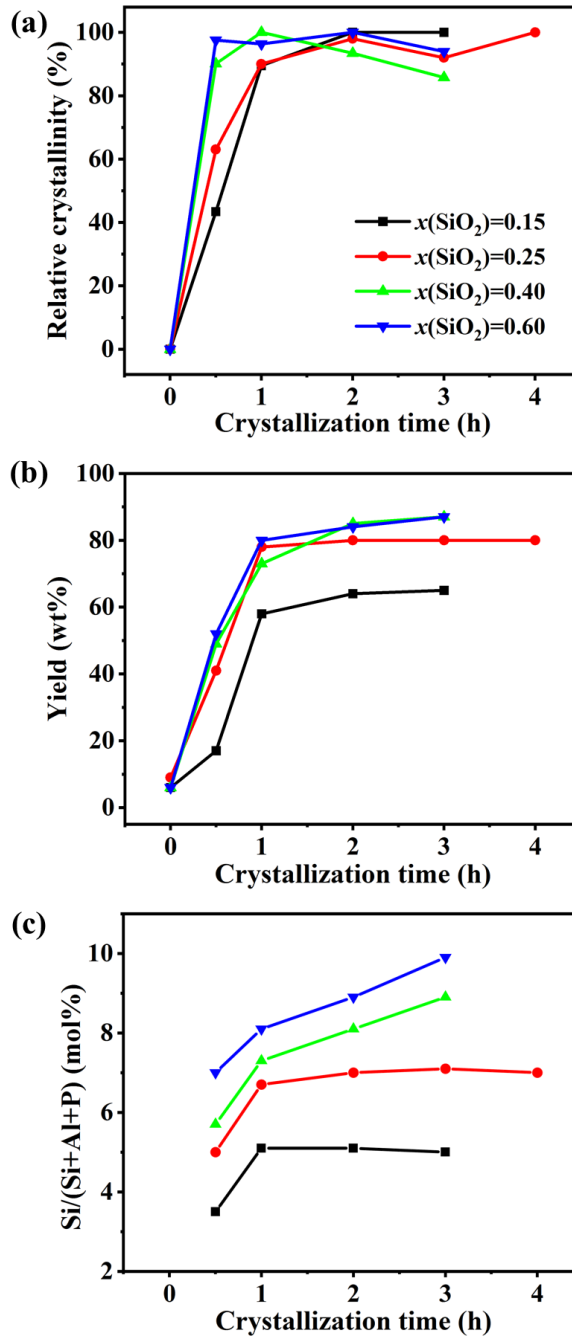

**Figure S10.** The evolution of (a) relative crystallinity, (b) solid yields and (c) product silica contents during the synthesis of SAPO-34 with different silica dosages.

The final gel molar composition was  $1.0\text{Al}_2\text{O}_3:1.0\text{P}_2\text{O}_5:x\text{SiO}_2:2.0\text{TEA}:1.0\text{DEA}:50\text{H}_2\text{O}$  (230 °C, mother liquid addition of 40 g).

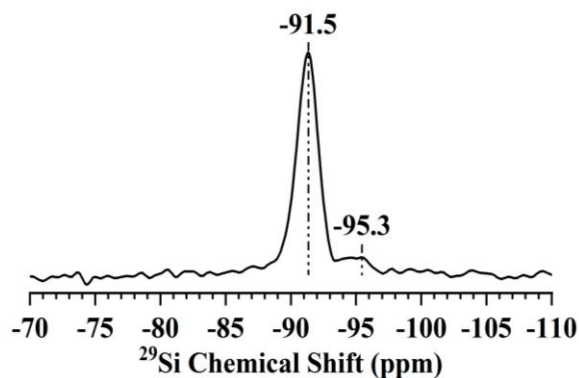

**Figure S11.**  $^{29}\text{Si}$  MAS NMR spectrum of the as-synthesized SAPO-34. The sample was synthesized at 240 °C for 3 h with a final gel molar composition of 1.0Al<sub>2</sub>O<sub>3</sub>:1.0P<sub>2</sub>O<sub>5</sub>:0.25SiO<sub>2</sub>:2.0TEA:1.0DEA:50H<sub>2</sub>O (mother liquid addition of 40 g).

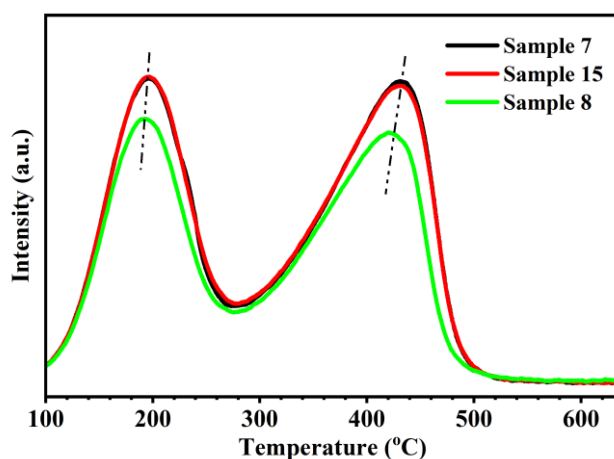

**Figure S12.** NH<sub>3</sub>-TPD curves of the rapidly synthesized SAPO-34.

| Sample | T-time <sup>a</sup> | NH <sub>3</sub> -TPD (mmol/g) |                   |
|--------|---------------------|-------------------------------|-------------------|
|        |                     | Weak                          | Moderate + Strong |
| 7      | 220 °C-3 h          | 0.48                          | 0.65              |
| 15     | 230 °C-2 h          | 0.48                          | 0.65              |
| 8      | 240 °C-1 h          | 0.42                          | 0.54              |

a: T and time were the crystallization temperature and time, respectively.

**Table S1.** Product phases, solid yields and silica contents of the samples synthesized with different dosages of mother liquid (230 °C, 1 h).

| Sample <sup>a</sup> | $M_m/M_{total}$ <sup>b</sup><br>(wt%) | Mother liquid<br>added           | Product             |                |                                    |
|---------------------|---------------------------------------|----------------------------------|---------------------|----------------|------------------------------------|
|                     |                                       |                                  | Crystal phase       | Yield<br>(wt%) | Elemental composition              |
| 9                   | 52.2                                  | 40 g                             | CHA                 | 78.0           | $Al_{0.499}P_{0.434}Si_{0.067}O_2$ |
| 10                  | 32.8                                  | 25 g                             | CHA                 | 80.0           | $Al_{0.500}P_{0.437}Si_{0.063}O_2$ |
| 11                  | 13.0                                  | 10 g                             | CHA/AEI + minor AFI | 72.3           | /                                  |
| 12                  | 0                                     | 0 g                              | CHA/AEI + minor AFI | 40.1           | /                                  |
| 3Ref                | 0                                     | 0 g<br>(2 wt% seed) <sup>c</sup> | CHA/AEI             | 79.0           | $Al_{0.501}P_{0.436}Si_{0.063}O_2$ |

<sup>a</sup> The final gel molar composition was  $1.0Al_2O_3:1.0P_2O_5:0.25SiO_2:2.0TEA:1.0DEA:50H_2O$ .

<sup>b</sup>  $M_m$ : mass of dry inorganic oxides from mother liquid.  $M_{total}$ : total mass of dry inorganic oxides in the final gel.

<sup>c</sup> The seed was prepared by ball milling method as the previously reported.<sup>[3]</sup>

**Table S2.** Product phases, solid yields and silica contents of the samples synthesized with different silica dosages (230 °C, 2 h).

| Sample <sup>a</sup> | $x SiO_2$ | Product         |             |                                    |       |
|---------------------|-----------|-----------------|-------------|------------------------------------|-------|
|                     |           | Crystal phase   | Yield (wt%) | Elemental composition              | $R^b$ |
| 13                  | 0.10      | CHA + minor AFI | /           | /                                  | -     |
| 14                  | 0.15      | CHA+ minor AFI  | 64.0        | $Al_{0.503}P_{0.446}Si_{0.051}O_2$ | 1.41  |
| 15                  | 0.25      | CHA             | 81.0        | $Al_{0.500}P_{0.433}Si_{0.070}O_2$ | 1.19  |
| 16                  | 0.40      | CHA             | 85.1        | $Al_{0.499}P_{0.420}Si_{0.081}O_2$ | 0.89  |
| 17                  | 0.60      | CHA             | 83.9        | $Al_{0.494}P_{0.419}Si_{0.088}O_2$ | 0.67  |

<sup>a</sup> The final gel molar composition was  $1.0Al_2O_3:1.0P_2O_5:xSiO_2:2.0TEA:1.0DEA:50H_2O$  (mother liquid addition of 40 g).

**Table S3.** Textural properties of the rapidly synthesized low-silica SAPO-34 samples.

| Sample | T-time <sup>a</sup> | Surface area <sup>b</sup> (m <sup>2</sup> /g) |             |           | Pore volume <sup>c</sup> (cm <sup>3</sup> /g) |             |            |
|--------|---------------------|-----------------------------------------------|-------------|-----------|-----------------------------------------------|-------------|------------|
|        |                     | $S_{total}$                                   | $S_{micro}$ | $S_{ext}$ | $V_{total}$                                   | $V_{micro}$ | $V_{meso}$ |
| 7      | 220 °C-3 h          | 559.5                                         | 556.2       | 3.4       | 0.28                                          | 0.26        | 0.02       |
| 15     | 230 °C-2 h          | 565.7                                         | 555.8       | 9.9       | 0.27                                          | 0.26        | 0.01       |
| 8      | 240 °C-1 h          | 541.2                                         | 532.8       | 8.4       | 0.28                                          | 0.26        | 0.02       |

a: T and time are crystallization temperature and time, respectively.

b:  $S_{total}$ : BET surface area;  $S_{micro}$ : t-plot micropore surface area;  $S_{ext} = S_{total} - S_{micro}$ .

c:  $V_{total}$  was evaluated at  $P/P_0 = 0.97$ ;  $V_{micro}$ : t-plot micropore volume;  $V_{meso} = V_{total} - V_{micro}$ .

**Table S4.** Lifetime and products distribution of the samples in the MTO reaction (WHSV<sub>methanol</sub> = 2h<sup>-1</sup>, T = 450°C, catalyst weight = 300 mg).

| Sample           | Lifetime <sup>a</sup><br>(min) | C <sub>2</sub> <sup>=</sup><br>(wt%) | C <sub>3</sub> <sup>=</sup><br>(wt%) | C <sub>2</sub> <sup>=</sup> +C <sub>3</sub> <sup>=</sup> <sup>b</sup><br>(wt%) |
|------------------|--------------------------------|--------------------------------------|--------------------------------------|--------------------------------------------------------------------------------|
| 7                | 378                            | 53.42                                | 32.59                                | 86.01                                                                          |
| 15               | 429                            | 54.43                                | 31.03                                | 85.46                                                                          |
| 8                | 395                            | 53.45                                | 32.07                                | 85.52                                                                          |
| 2 <sub>Ref</sub> | 378                            | 53.14                                | 32.42                                | 85.56                                                                          |

<sup>a</sup> Catalyst lifetime is defined as the reaction duration with >99 % methanol conversion.

<sup>b</sup> The highest selectivity of C<sub>2</sub><sup>=</sup> and C<sub>3</sub><sup>=</sup> under > 99 % methanol conversion.

## Reference

1. Peng Tian, Xiong Su, Yingxia Wang, Qinghua Xia, Ying Zhang, Dong Fan, Shuanghe Meng and Zhongmin Liu. Phase-Transformation synthesis of SAPO-34 and a novel SAPO molecular sieve with RHO framework type from a SAPO-5 precursor, *Chem. Mater.* 2011, 23, 1406.
2. R. F. Mortlock, A. T. Bell and C. J. Radke. <sup>31</sup>P and <sup>27</sup>Al NMR investigations of highly acidic, aqueous solutions containing aluminum and phosphorus, *J. Phys. Chem.* 1993, 97, 767.
3. Miao Yang, Peng Tian, Chan Wang, Yangyang Yuan, Yue Yang, Shutao Xu, Yanli He, Zhongmin Liu. A top-down approach to prepare silicoaluminophosphate molecular sieve nanocrystals with improved catalytic activity, *Chem. Commun.* 2014, 50, 1845.
